# Supplementary material for: Selective gas–solid phase fixation of carbon dioxide into oxirane-containing polymers: synthesis of polymer bearing cyclic carbonate group
Source: Royal Society of Chemistry journal article supplement (doi:10.1039/b516881c), 2006-01-01

**ESI for “Synthesis of polymer bearing cyclic carbonate group by selective gas-solid phase reaction of carbon dioxide into oxirane-containing polymers” by Bungo Ochiai, Tokinori Iwamoto and Takeshi Endo**

**Relationship between time and  $\ln([Ox]_0/[Ox])$  (conversion <85%).**

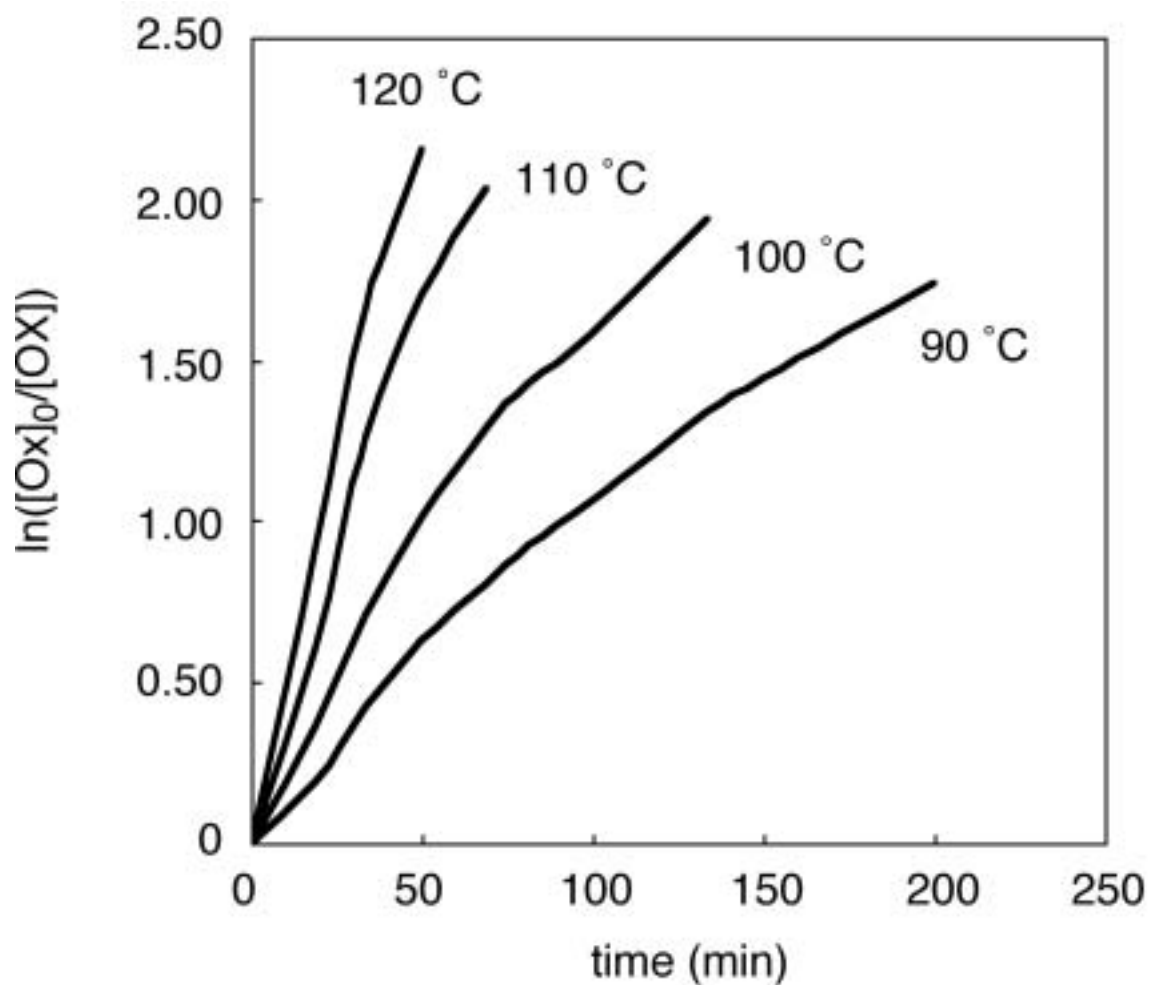

|                                      |       |       |       |       |
|--------------------------------------|-------|-------|-------|-------|
| Temp (°C)                            | 90    | 100   | 110   | 120   |
| $k \times 10^3$ (min <sup>-1</sup> ) | 9.74  | 17.6  | 32.1  | 45.5  |
| $r^2$                                | 0.958 | 0.964 | 0.972 | 0.985 |

### Relationship between $1/T$ and $\log k$

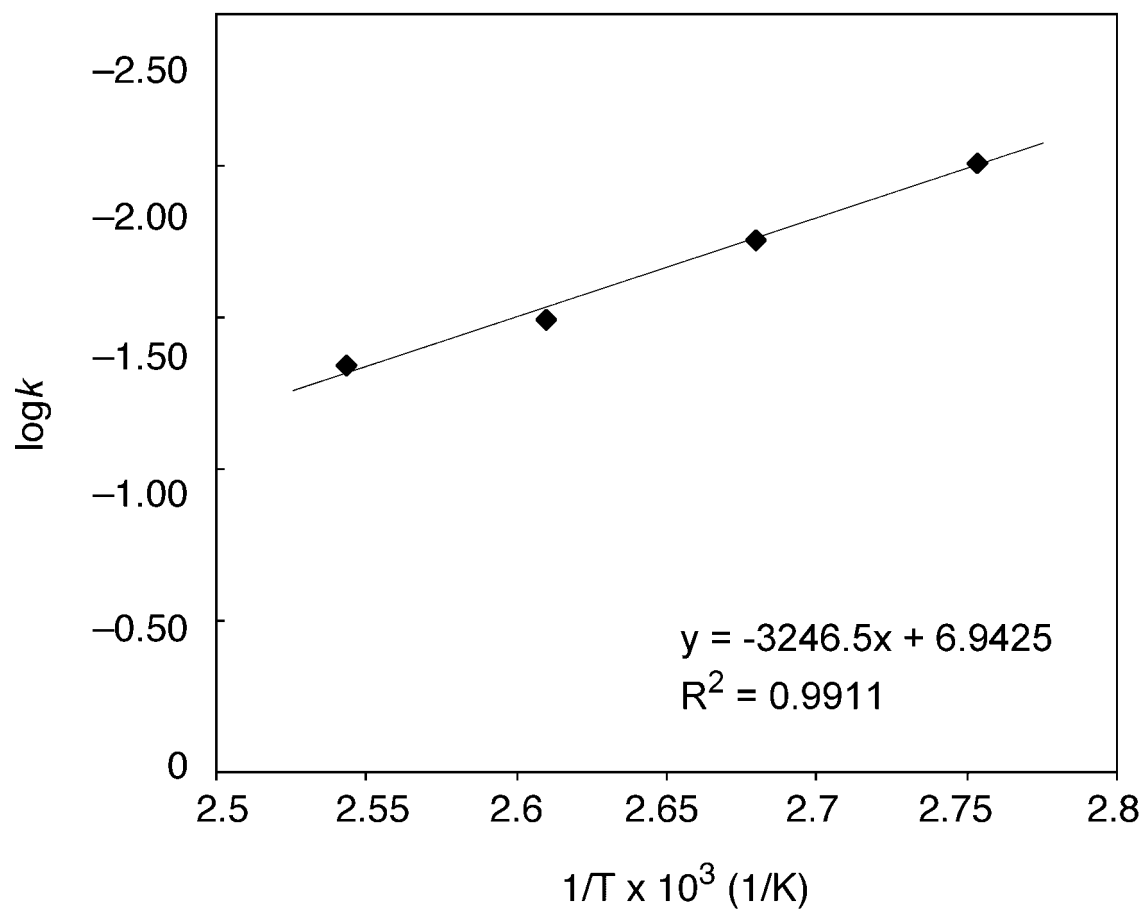

Supplement: b516881c.pdf [file b516881c.pdf]
